# Supplementary material for: A Ni(ii)MOF-based hypersensitive dual-function luminescent sensor towards the 3-nitrotyrosine biomarker and 6-propyl-2-thiouracil antithyroid drug in urine
Source: Royal Society of Chemistry journal article supplement (doi:10.1039/d4tb01618a), 2024-01-01
Supplement: d4tb01618a1.pdf [file d4tb01618a1.pdf]

*Electronic Supplementary Information (ESI) for*

## **Ni(II)MOF based hypersensitive dual-function luminescent sensor towards 3-nitrotyrosine biomarker and 6-propyl-2-thiouracil antithyroid drug in urine**

Wencui Li<sup>a,†</sup>, Liying Liu<sup>a,†</sup>, Xiaoting Li<sup>a</sup>, Hu Ren<sup>a</sup>, Lu Zhang<sup>a</sup>, Mohammad Khalid Parvez<sup>c</sup>, Mohammed S. Al-Dosari<sup>c</sup>,  
5 Liming Fan<sup>\*a</sup> and Jianqiang Liu<sup>\*b</sup>

<sup>a</sup> School of Chemistry and Chemical Engineering, North University of China, Taiyuan 030051, P. R. China.

<sup>b</sup> Dongguan Key Laboratory of Drug Design and Formulation Technology, Guangdong Provincial Key Laboratory of Medical Molecular Diagnostics, Guangdong Medical University, Dongguan 523000, P. R. China.

<sup>c</sup> Department of Chemistry, College of Sciences, King Saud University, Riyadh 11451, Saudi Arabia.

10 E-mail: limingfan@nuc.edu.cn; jianqiangliu8@gdmu.edu.cn.

### **Table of Contents**

|                                                                                                                                                                                                                                                                                                               |    |
|---------------------------------------------------------------------------------------------------------------------------------------------------------------------------------------------------------------------------------------------------------------------------------------------------------------|----|
| <b>Table S1</b> Comparative performances of MOFs-based luminescent sensors in detecting 3-NT biomarker.....                                                                                                                                                                                                   | 3  |
| <b>Table S2</b> Crystal data of NiMOF.....                                                                                                                                                                                                                                                                    | 3  |
| <b>Table S3</b> Selected bond lengths (Å) and angles (°) of NiMOF.....                                                                                                                                                                                                                                        | 3  |
| 15 <b>Fig. S1</b> The coordination modes of H <sub>2</sub> L in the assembly of NiMOF.....                                                                                                                                                                                                                    | 4  |
| <b>Fig. S2</b> The trinuclear cluster in NiMOF.....                                                                                                                                                                                                                                                           | 4  |
| <b>Fig. S3</b> The 3D porous framework of NiMOF with the sugarcoated haws shaped channels.....                                                                                                                                                                                                                | 4  |
| <b>Fig. S4</b> The simplified 3,9-c{4 <sup>2</sup> .6} <sub>3</sub> {4 <sup>6</sup> .6 <sup>21</sup> .8 <sup>9</sup> }-x <sub>m</sub> z net for NiMOF.....                                                                                                                                                    | 4  |
| <b>Fig. S5</b> PXRD patterns of NiMOF.....                                                                                                                                                                                                                                                                    | 5  |
| 20 <b>Fig. S6</b> PXRD patterns of NiMOF after immersed in aqueous solution with different pH values for 12 hours.....                                                                                                                                                                                        | 5  |
| <b>Fig. S7</b> FT-IR spectra of NiMOF immersed in aqueous solution with different pH values for 12 hours.....                                                                                                                                                                                                 | 5  |
| <b>Fig. S8</b> Emission spectra of NiMOF suspensions in aqueous solutions at pH = 4-8.....                                                                                                                                                                                                                    | 6  |
| <b>Fig. S9</b> TG-DTG curve of NiMOF.....                                                                                                                                                                                                                                                                     | 6  |
| <b>Fig. S10</b> Luminescence of H <sub>2</sub> L and NiMOF.....                                                                                                                                                                                                                                               | 6  |
| 25 <b>Fig. S11</b> Emission spectra of NiMOF suspensions in aqueous solution containing 10 mM urine analytes.....                                                                                                                                                                                             | 7  |
| <b>Fig. S12</b> Emission spectra of the suspensions of NiMOF by gradual addition of 3-NT.....                                                                                                                                                                                                                 | 7  |
| <b>Fig. S13</b> The response time of NiMOF in sensing 3-NT in aqueous solutions.....                                                                                                                                                                                                                          | 7  |
| <b>Fig. S14</b> Anti-interference performance of NiMOF in sensing 3-NT in aqueous solutions.....                                                                                                                                                                                                              | 8  |
| <b>Fig. S15</b> PXRD patterns of NiMOF after 5 cycles sensing 3-NT and 6-PTU.....                                                                                                                                                                                                                             | 8  |
| 30 <b>Fig. S16</b> FT-IR spectra of NiMOF after 5 cycles sensing 3-NT and 6-PTU.....                                                                                                                                                                                                                          | 8  |
| <b>Fig. S17</b> The response time of NiMOF in sensing 6-PTU in aqueous solutions.....                                                                                                                                                                                                                         | 9  |
| <b>Fig. S18</b> Anti-interference performance of NiMOF in sensing 6-PTU in aqueous solutions.....                                                                                                                                                                                                             | 9  |
| <b>Fig. S19</b> Emission spectra of the suspensions of NiMOF by gradual addition of 6-PTU.....                                                                                                                                                                                                                | 9  |
| <b>Fig. S20</b> The truth table of Gate 1, Gate 2 and Gate 3 in 6-PTU detection.....                                                                                                                                                                                                                          | 10 |
| 35 <b>Fig. S21</b> (a) The electronic equivalent circuit utilizing tandem combinational logic gates of 3-NT. (b) Threshold histograms depicting the relative luminescence intensity ( $I_0/I$ ) for each individual logic gate of 3-NT. (c) Output signals aligned with varying C <sub>3-NT</sub> inputs..... | 10 |
| <b>Fig. S22</b> The truth table of Gate 1, Gate 2 and Gate 3 in 3-NT detection.....                                                                                                                                                                                                                           | 10 |

**Materials and Methods.** H<sub>2</sub>L, selected analytes, as well as all other starting reagents are readily obtainable from commercial sources and were utilized directly. The EA-1110 elemental analyzer is utilized for conducting the elemental analysis of carbon, oxygen, and hydrogen. FT-IR spectrum was captured precisely using a Nicolet NEXUS-670 FT-IR spectrometer, employing the KBr pellet. TG-DTG curve was acquired *via* a PerkinElmer DTA-5 6000 synchronous thermal analyzer, encompassing a temperature range from 30°C to 800°C under N<sub>2</sub> atmosphere, with a gradual heating rate of 10°C per minute. PXRD data were comprehensively gathered using a Rigaku D/Max-2500 PC diffractometer ( $\lambda=1.5418$  Å). UV-vis diffuse reflectance spectra were gathered utilizing a JASCO V-750 spectrophotometer. Additionally, luminescent spectra were collected by a Hitachi F-4600 spectrophotometer, with a 450 W Xenon lamp as excitation source.

**10 Preparation of  $\{[\text{Ni}_3(\text{L})_3(\mu_2\text{-H}_2\text{O})]\cdot 6\text{H}_2\text{O}\cdot 2\text{DMA}\}_n$  (NiMOF).** A mixture comprising 0.02 mmol H<sub>2</sub>L, 0.06 mmol NiCl<sub>2</sub>·6H<sub>2</sub>O, 2 mL acetonitrile, 3 mL DMA, and 3 mL H<sub>2</sub>O were sequentially added into the PTFE lining of 25 mL stainless steel reaction and heated at 120°C for 3 days. After cooled to room temperature at a 10 °C/h decreasing rate, the green block crystals of NiMOF were obtained with a 39 % yield (based on H<sub>2</sub>L). Anal. Calcd for C<sub>56</sub>H<sub>70</sub>N<sub>2</sub>Ni<sub>3</sub>O<sub>28</sub>: C, 48.21; N, 2.01; H, 5.06. Found: C, 48.52; N, 1.98; H, 5.19. IR (KBr, cm<sup>-1</sup>): 3428(w), 2825(w), 15 2360(w), 1623 (vs), 1394 (vs), 1182 (w), 1008 (w), 782 (s), 678 (s).

**X-ray Crystallography.** A flawless, green block crystal of NiMOF was diligently chosen and performed to a Rigaku XtaLAB Synergy diffractometer to acquire single-crystal X-ray diffraction data through the utilization of Mo-K $\alpha$  radiation ( $\lambda=0.71073$  Å) at 150 K. Subsequently, the crystal structure of NiMOF was analyzed and refined with the assistance of the SHELXL-2018/3 package. Free solvents were omitted and were determined based on the results of 20 EA and TGA. Due to the flexible backbone of H<sub>2</sub>L ligand, related carbon atoms exhibited disorder, necessitating refinement with an occupancy ratio of 86:14 for C8, C9 and C8', C9', and 38.3:61.7 for C18-C24 and C18'-C24', respectively. Refined cif file of NiMOF has been deposited at <https://ccdc.cam.ac.uk>, with the CCDC number is 2370376. Table S2 provides comprehensive crystallographic data and details of the NiMOF crystal structure. Additionally, the Ni-O bond distances and select bond angles of NiMOF were listed in Table S3.

**25 Luminescent Sensing Operation.** Initially, the preparation of the tested samples involved the incorporation of 1 mg of thoroughly ground NiMOF powder into 2 mL aqueous solutions containing 10 mM urine species of ammonium chloride (NH<sub>4</sub>Cl), urea, potassium chloride (KCl), uric acid (UA), calcium chloride (CaCl<sub>2</sub>), cysteine (Cys), creatinine (Crea), Creatine (Cre), sodium chloride (NaCl), glucose (Gluc), magnesium chloride (MgCl<sub>2</sub>), phenylalanine (Phe), histidine (His), 3-NT biomarker, and antithyroid drug of 6-PTU. Subsequently, 30 the luminescent sensing capabilities of these analytes in the NiMOF suspensions were evaluated using a Hitachi F-4600 spectrophotometer. Furthermore, gradient titration experiments were conducted in water and 100-fold diluted urine by adding varying volumes of 3-NT or 6-PTU into the NiMOF suspensions, and corresponding response emission spectra were recorded. Additionally, to evaluate the anti-interference capabilities of NiMOF in detecting 6-PTU and 3-NT, equimolar concentrations of interfering species were introduced into NiMOF 35 suspensions containing 10 mM of the target analytes. Lastly, the reusability of NiMOF in detecting 6-PTU and 3-NT was assessed by utilizing recycled NiMOF samples that had undergone filtration, washing, and drying procedures.

**Table S1** Comparative performances of MOFs-based luminescent sensors in detecting 3-NT biomarker.

|   | MOFs Based Sensor | $K_{sv}$ ( $M^{-1}$ ) | LOD ( $\mu M$ ) | Media            | Reference |
|---|-------------------|-----------------------|-----------------|------------------|-----------|
| 1 | HfMOF             | $3.10 \times 10^4$    | 0.54            | HEPES solution   | 42        |
| 2 | ZnMOF             | $6.59 \times 10^4$    | 0.31            | H <sub>2</sub> O | 43        |
| 3 | CdMOF             | $9.58 \times 10^4$    | 0.43            | H <sub>2</sub> O | 44        |
| 4 | CoMOF-1           | $9.19 \times 10^4$    | 0.10            | PBS solution     | 45        |
| 5 | CoMOF-2           | $1.05 \times 10^5$    | 0.09            | PBS solution     | 45        |
| 6 | CuMOF             | $1.94 \times 10^4$    | 0.49            | H <sub>2</sub> O | 46        |
| 7 | NiMOF             | $1.42 \times 10^5$    | 0.17            | H <sub>2</sub> O | 35        |
| 8 | NiMOF             | $3.11 \times 10^4$    | 0.31            | H <sub>2</sub> O | This work |

**Table S2** Crystal data of NiMOF.

|                                         |                                                                 |
|-----------------------------------------|-----------------------------------------------------------------|
| Empirical formula                       | C <sub>48</sub> H <sub>40</sub> Ni <sub>3</sub> O <sub>20</sub> |
| Formula weight                          | 1112.93                                                         |
| Crystal system                          | monoclinic                                                      |
| Space group                             | C2/c                                                            |
| $a$ [ $\text{\AA}$ ]                    | 23.2911(15)                                                     |
| $b$ [ $\text{\AA}$ ]                    | 18.3233(11)                                                     |
| $c$ [ $\text{\AA}$ ]                    | 16.5576(9)                                                      |
| $\alpha$ ( $^\circ$ )                   | 90                                                              |
| $\beta$ ( $^\circ$ )                    | 104.174(2)                                                      |
| $\gamma$ ( $^\circ$ )                   | 90                                                              |
| $V$ [ $\text{\AA}^3$ ]                  | 6851.2(7)                                                       |
| $Z$                                     | 4                                                               |
| $D_c$ ( $\text{g}\cdot\text{cm}^{-3}$ ) | 1.078                                                           |
| $F(000)$                                | 2288                                                            |
| $\mu$ (Mo $K\alpha$ )/ $\text{mm}^{-1}$ | 0.872                                                           |
| Data/restraints/parameters              | 7044/391/422                                                    |
| $R_{\text{int}}$                        | 0.0774                                                          |
| Goodness-of-fit on $F^2$                | 1.073                                                           |
| $R_1, wR_2 [I > 2\sigma(I)]$            | 0.0438, 0.1062                                                  |
| $R_1, wR_2$ (all data)                  | 0.0638, 0.1143                                                  |
| CCDC number                             | 2370376                                                         |

**5 Table S3** Selected bond lengths ( $\text{\AA}$ ) and angles ( $^\circ$ ) of NiMOF.

|                          |            |                                |            |                                                |           |
|--------------------------|------------|--------------------------------|------------|------------------------------------------------|-----------|
| Ni(1)-O(5)               | 2.067(2)   | O(5)-Ni(1)-O(6)                | 83.72(9)   | O(2)-Ni(2)-O(1W) <sup>#6</sup>                 | 89.03(7)  |
| Ni(1)-O(6)               | 2.070(2)   | O(5)-Ni(1)-O(4) <sup>#1</sup>  | 92.53(9)   | O(9) <sup>#3</sup> -Ni(2)-O(1W) <sup>#6</sup>  | 91.28(8)  |
| Ni(1)-O(4) <sup>#1</sup> | 2.0795(19) | O(6)-Ni(1)-O(4) <sup>#1</sup>  | 176.09(9)  | O(9) <sup>#4</sup> -Ni(2)-O(1W) <sup>#6</sup>  | 93.60(8)  |
| Ni(1)-O(1)               | 2.0812(18) | O(5)-Ni(1)-O(1)                | 95.79(10)  | O(2)-Ni(2)-O(2) <sup>#2</sup>                  | 92.85(10) |
| Ni(1)-O(8)               | 2.0853(19) | O(6)-Ni(1)-O(1)                | 89.68(8)   | O(2)-Ni(2)-O(9) <sup>#3</sup>                  | 92.13(8)  |
| Ni(1)-O(7)               | 2.1886(19) | O(4) <sup>#1</sup> -Ni(1)-O(1) | 91.82(7)   | O(2) <sup>#2</sup> -Ni(2)-O(9) <sup>#3</sup>   | 174.50(8) |
| Ni(2)-O(2) <sup>#2</sup> | 2.0841(17) | O(5)-Ni(1)-O(8)                | 167.95(10) | O(2)-Ni(2)-O(9) <sup>#4</sup>                  | 174.51(8) |
| Ni(2)-O(2) <sup>#2</sup> | 2.0841(17) | O(6)-Ni(1)-O(8)                | 91.98(8)   | (2) <sup>#2</sup> -Ni(2)-O(9) <sup>#4</sup>    | 92.13(8)  |
| Ni(2)-O(9) <sup>#3</sup> | 2.090(2)   | O(4) <sup>#1</sup> -Ni(1)-O(8) | 91.47(8)   | O(9) <sup>#3</sup> -Ni(2)-O(9) <sup>#4</sup>   | 82.99(12) |
| Ni(2)-O(9) <sup>#4</sup> | 2.090(2)   | O(1)-Ni(1)-O(8)                | 95.44(7)   | O(2)-Ni(2)-O(1W) <sup>#5</sup>                 | 86.48(7)  |
| Ni(2)-O(1) <sup>#5</sup> | 2.1349(19) | O(5)-Ni(1)-O(7)                | 107.18(10) | O(2) <sup>#2</sup> -Ni(2)-O(1W) <sup>#5</sup>  | 89.03(7)  |
| Ni(2)-O(1) <sup>#6</sup> | 2.1349(19) | O(6)-Ni(1)-O(7)                | 92.57(9)   | O(9) <sup>#3</sup> -Ni(2)-O(1W) <sup>#5</sup>  | 93.60(8)  |
|                          |            | O(4) <sup>#1</sup> -Ni(1)-O(7) | 87.45(8)   | O(9) <sup>#4</sup> -Ni(2)-O(1W) <sup>#5</sup>  | 91.28(8)  |
|                          |            | O(1)-Ni(1)-O(7)                | 157.02(7)  | O(2) <sup>#2</sup> -Ni(2)-O(1W) <sup>#6</sup>  | 86.47(7)  |
|                          |            | O(8)-Ni(1)-O(7)                | 61.64(7)   | O(1W) <sup>#5</sup> -Ni(2)-O(1W) <sup>#6</sup> | 173.48(9) |

Symmetry codes: #1 0.5-x, -0.5+y, 1.5-z; #2 -x, y, 0.5-z; #3 x, 1+y, z; #4 -x, 1+y, 0.5-z; #5 x, 1-y, -0.5+z; #6 x, 1-y, -0.5+z.

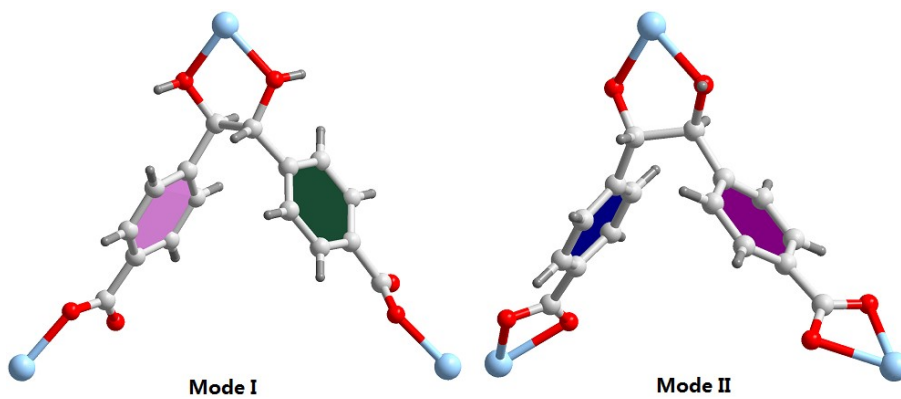

**Mode I** **Mode II**  
**Fig. S1** The coordination modes of H<sub>2</sub>L in the assembly of NiMOF.

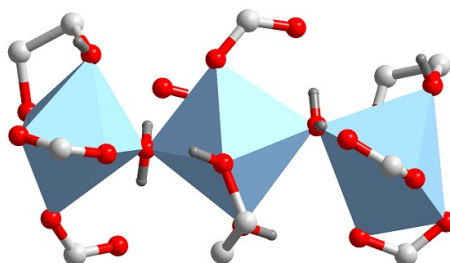

**Fig. S2** The trinuclear cluster in NiMOF.

5

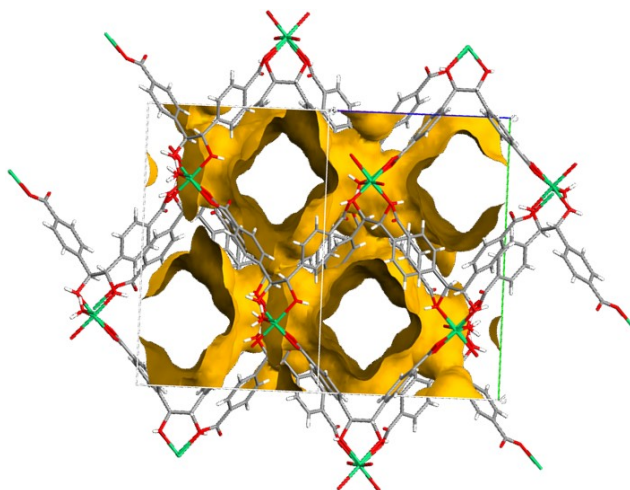

**Fig. S3** The 3D porous framework of NiMOF with the sugarcoated haws shaped channels.

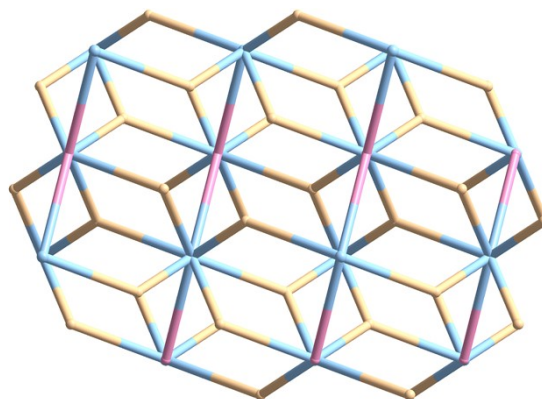

**Fig. S4** The simplified 3,9-c{4<sup>2</sup>.6}<sub>3</sub>{4<sup>6</sup>.6<sup>21</sup>.8<sup>9</sup>}-x mz net for NiMOF.

10

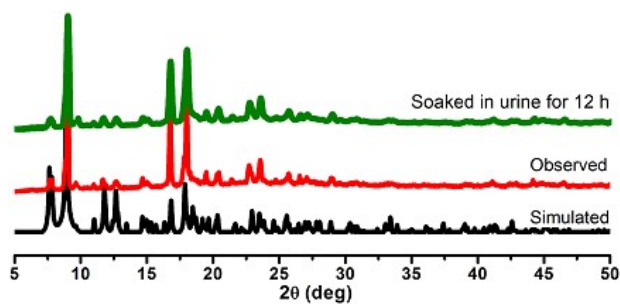

Fig. S5 PXRD patterns of NiMOF.

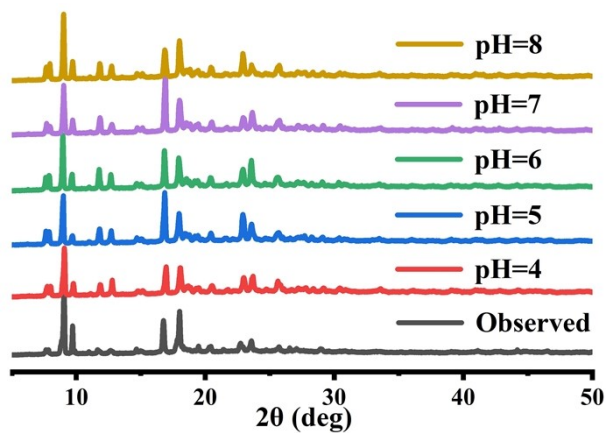

5 Fig. S6 PXRD patterns of NiMOF after immersed in aqueous solution with different pH values for 12 hours.

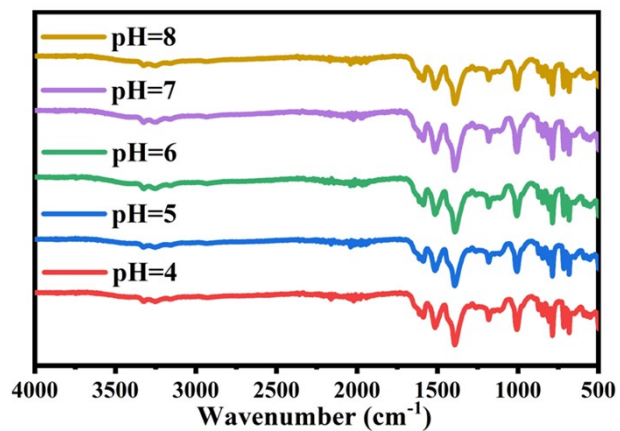

Fig. S7 FT-IR spectra of NiMOF immersed in aqueous solution with different pH values for 12 hours.

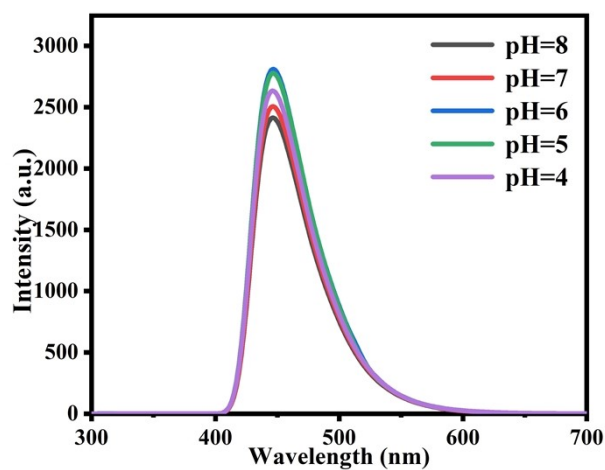

Fig. S8 Emission spectra of NiMOF suspensions in aqueous solutions at pH = 4-8.

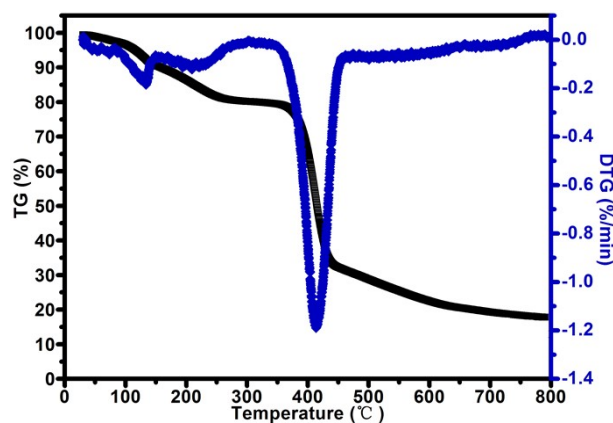

Fig. S9 TG-DTG curve of NiMOF.

5

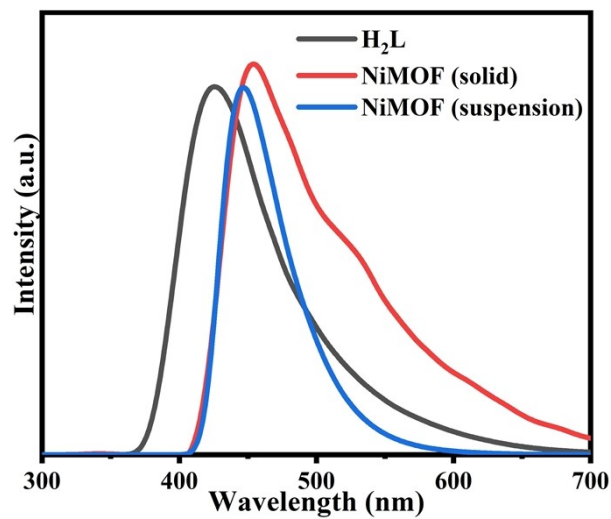

Fig. S10 Luminescence of H<sub>2</sub>L and NiMOF.

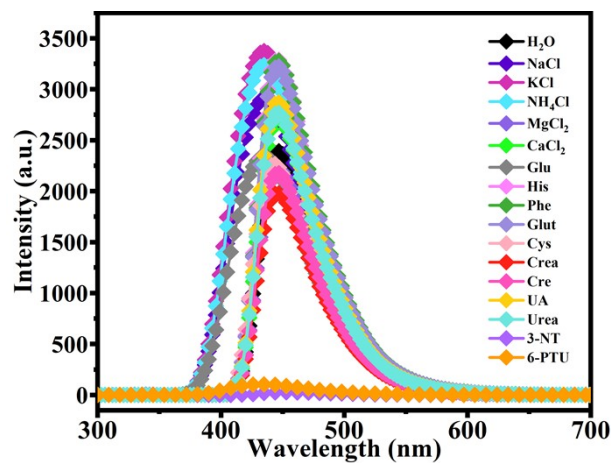

Fig. S11 Emission spectra of NiMOF suspensions in aqueous solution containing 10 mM urine analytes.

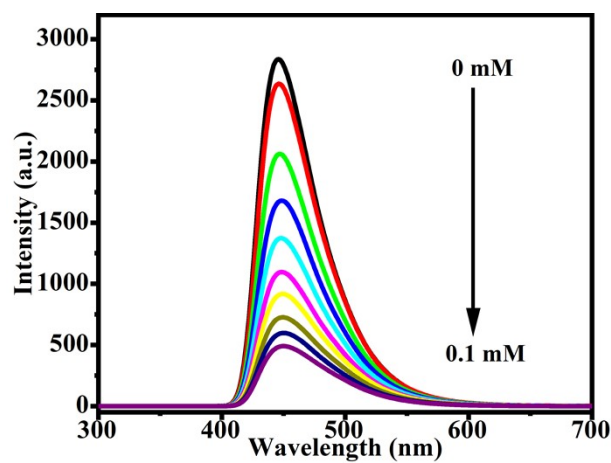

5 Fig. S12 Emission spectra of the suspensions of NiMOF by gradual addition of 3-NT.

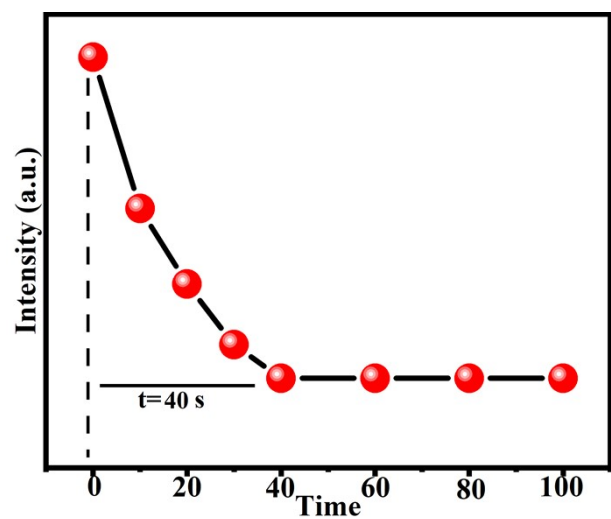

Fig. S13 The response time of NiMOF in sensing 3-NT in aqueous solutions.

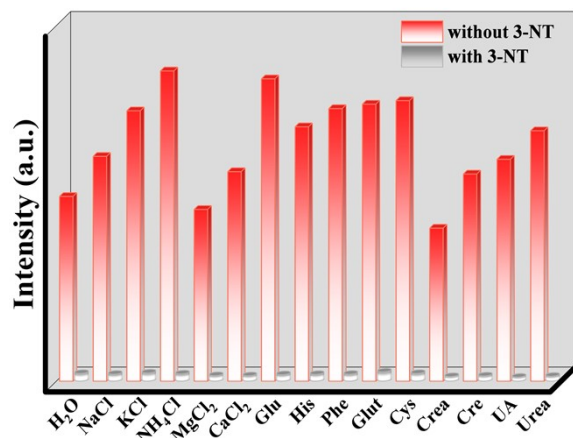

Fig. S14 Anti-interference performance of NiMOF in sensing 3-NT in aqueous solutions.

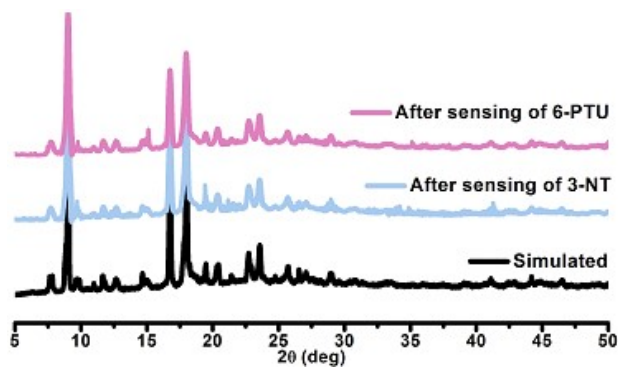

5

Fig.S15 PXRD patterns of NiMOF after 5 cycles sensing 3-NT and 6-PTU.

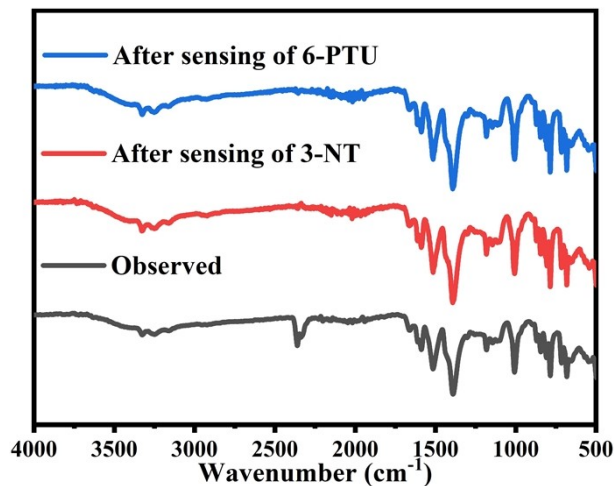

Fig. S16 FT-IR spectra of NiMOF after 5 cycles sensing 3-NT and 6-PTU.

10



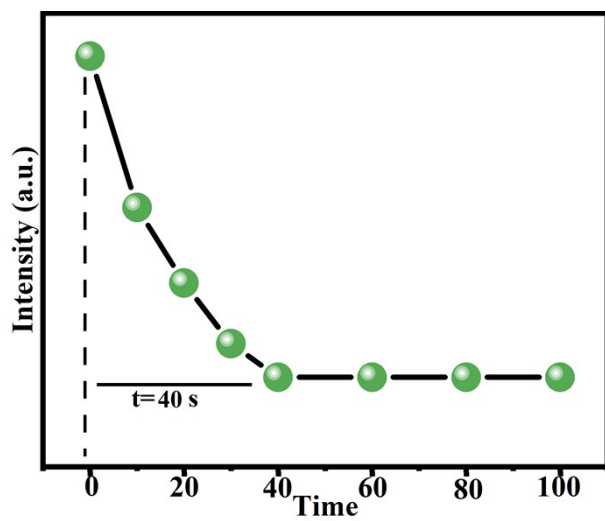

Fig. S17 The response time of NiMOF in sensing 6-PTU in aqueous solutions.

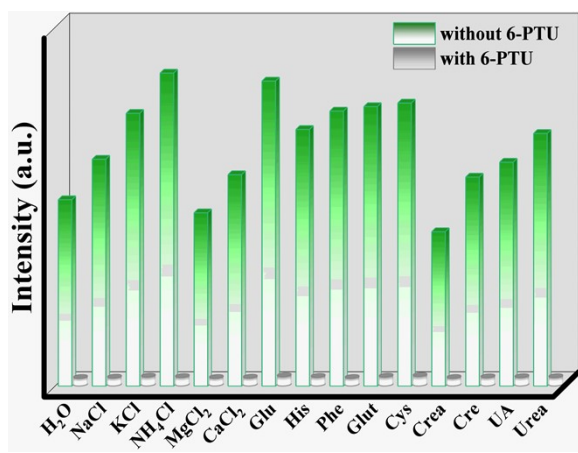

5 Fig. S18 Anti-interference performance of NiMOF in sensing 6-PTU in aqueous solutions.

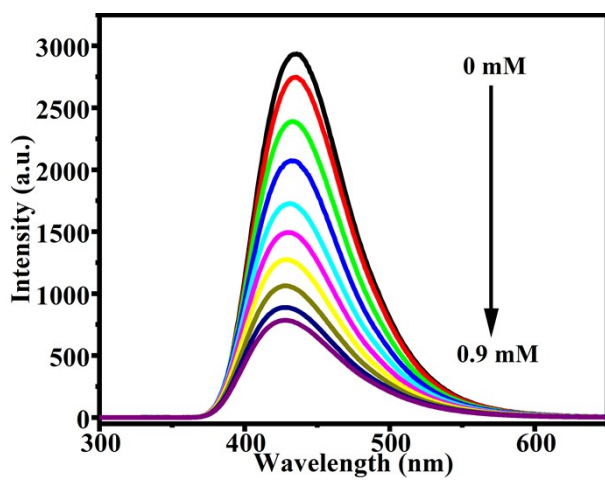

Fig. S19 Emission spectra of the suspensions of NiMOF by gradual addition of 6-PTU.

| Gate 1      |                      |          | Gate 2      |                      |          |             | Gate 3               |          |          |  |
|-------------|----------------------|----------|-------------|----------------------|----------|-------------|----------------------|----------|----------|--|
| Input 1     |                      | Output 1 | Input 2     |                      | Output 2 | Input 3     |                      | Output 2 | Output 3 |  |
| $C_{6-PTU}$ | $\lambda_{EX}=336nm$ |          | $C_{6-PTU}$ | $\lambda_{EX}=336nm$ |          | $C_{6-PTU}$ | $\lambda_{EX}=336nm$ |          |          |  |
| 0           | 0                    | 0        | 0           | 0                    | 0        | 0           | 0                    | 0        |          |  |
| 1           | 0                    | 0        | 1           | 0                    | 0        | 0           | 1                    | 0        |          |  |
| 0           | 1                    | 0        | 0           | 1                    | 0        | 0           | 0                    | 1        |          |  |
| 1           | 1                    | 1        | 1           | 1                    | 1        | 1           | 1                    | 1        |          |  |

Fig. S20 The truth table of Gate 1, Gate 2 and Gate 3 in 6-PTU detection.

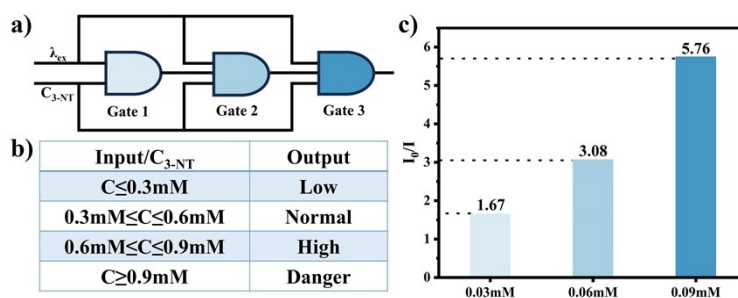

5 Fig. S21 (a) The electronic equivalent circuit utilizing tandem combinational logic gates of 3-NT. (b) Threshold histograms depicting the relative luminescence intensity ( $I_0/I$ ) for each individual logic gate of 3-NT. (c) Output signals aligned with varying  $C_{3-NT}$  inputs.

| Gate 1         |            |          | Gate 2         |            |          |                | Gate 3     |          |          |  |
|----------------|------------|----------|----------------|------------|----------|----------------|------------|----------|----------|--|
| Input 1        |            | Output 1 | Input 2        |            | Output 2 | Input 3        |            | Output 2 | Output 3 |  |
| $\lambda_{ex}$ | $C_{3-NT}$ |          | $\lambda_{ex}$ | $C_{3-NT}$ |          | $\lambda_{ex}$ | $C_{3-NT}$ |          |          |  |
| 0              | 0          | 0        | 0              | 0          | 0        | 0              | 0          | 0        |          |  |
| 0              | 1          | 0        | 0              | 1          | 0        | 0              | 0          | 0        |          |  |
| 1              | 0          | 0        | 1              | 0          | 0        | 0              | 0          | 0        |          |  |
| 1              | 1          | 1        | 0              | 0          | 1        | 0              | 0          | 0        |          |  |
|                |            |          | 1              | 0          | 1        | 0              | 1          | 0        |          |  |
|                |            |          | 1              | 1          | 0        | 0              | 1          | 0        |          |  |
|                |            |          | 0              | 1          | 1        | 0              | 0          | 0        |          |  |
|                |            |          | 0              | 1          | 1        | 1              | 1          | 0        |          |  |
|                |            |          | 1              | 1          | 1        | 1              | 1          | 1        |          |  |

Fig. S22 The truth table of Gate 1, Gate 2 and Gate 3 in 3-NT detection.
